# Supplementary material for: A combinational effect of acetaminophen and oriental herbs on the regulation of inflammatory mediators in microglia cell line, BV2
Source: PubMed Central journal article supplement — Anat Cell Biol. 2015 Dec 21;48(4):244–50. doi: 10.5115/acb.2015.48.4.244 (PMC4701697; doi:10.5115/acb.2015.48.4.244), 2015-12-21
Supplement: acb-48-244-s002.pdf [file acb-48-244-s002.pdf]

**Supplemental Table 2. The increased genes by *Scutellaria baicalensis* treatment in lipopolysaccharide (LPS)-stimulated BV2 cells**

| <b>Increased Gene by <i>S. baicalensis</i> after LPS treatment</b>              |
|---------------------------------------------------------------------------------|
| Solute carrier family 6 (neurotransmitter transporter, glycine), member 9       |
| Glutamate-cysteine ligase , modifier subunit                                    |
| Solute carrier family 7 (cationic amino acid transporter, y+ system), member 11 |
| Rhomboid domain containing 1                                                    |
| Sulfiredoxin 1 homolog ( <i>S. cerevisiae</i> )                                 |
| Tribbles homolog 3 ( <i>Drosophila</i> )                                        |
| Sulfiredoxin 1 homolog ( <i>S. cerevisiae</i> )                                 |
| Heme oxygenase (decycling) 1                                                    |
| Sequestosome 1                                                                  |

BV2 cells were treated with 1 µg/ml concentration of LPS and *S. baicalensis* for 12 hours. RNAs were extracted from treated cells using RNA isolation kit (Qiagen) and microarray analysis using Affimetrix Mouse 430\_2.0 (39,000 genes) chips was requested at Institute for human genome in Seoul National University. Genes increased more than two folds in compared with LPS-stimulated BV2 cells were listed in Supplemental Table 2.
